# Supplementary material for: Deficiency of hyccin, a newly identified membrane protein, causes hypomyelination and congenital cataract
Source: Springer Nature journal article supplement (doi:10.1038/ng1870), 2006-09-03
Supplement: ng1870-S7.pdf [file ng1870-S7.pdf]

**Supplementary table 2.** Family-specific and cumulative lod scores for chromosome 7 markers

| Marker ID | Distance from previous marker | LOD Scores |          |          |          |
|-----------|-------------------------------|------------|----------|----------|----------|
|           |                               | Cumulative | Family 2 | Family 3 | Family 5 |
| D7S517    | 0                             | -4.87      | -2.48    | -1.19    | -1.20    |
| D7S513    | 8.7                           | 1.56       | 1.11     | -1.21    | 1.66     |
| D7S507    | 11.8                          | 4.54       | 1.19     | 1.64     | 1.71     |
| D7S493    | 6.3                           | 4.54       | 1.20     | 1.67     | 1.67     |
| D7S516    | 7.8                           | 1.84       | 1.19     | 1.64     | -0.99    |
| D7S484    | 13.2                          | 0.17       | 1.19     | -1.35    | 0.33     |
| D7S510    | 5.1                           | -1.15      | 1.18     | -1.28    | -1.05    |
